# Supplementary material
Source: publisher site journal article supplement (https://www.dovepress.com/get_supplementary_file.php?f=291314.docx)
Supplement: Supplementary file 1 [file get_supplementary_file.php]

# Supplementary data 1

## High glucose promoted PARP-1 overexpression and SIRT-1 down-expression in MCs in a time- and dose-dependent manner

According previous research, hyperglycemia can cause the accumulation of ECM and cell death in mice kidney 1. The different doses and treated-times of the glucose, however, can be significantly correlated with the result of the experiment 2. Therefore, we further examined the cytotoxicity of a range of concentration of glucose (5, 10, 25, 50 mM) for varying durations (0, 24, 36, 48, and 72 hours) in MCs in order to access the most suitable experimental conditions. Cell viability differs upon different time treatment of glucose ranging from 5 to 50 mM (data not shown). And then the expression of PARP-1 and SIRT-1 in MCs exposed to different dosages of glucose conditions were measured with the Western blotting to explore functional dosage and time manner of glucose (Supplementary Figure 1A, 1B, 1C, 1D, 1E). Although the great changes of the levels of PARP-1 in 10 mM and 25 mM have appeared at 24 h and 36 h (for P < 0.05), the significant changes both in PARP-1 and SIRT-1 proteins levels mainly occurred between 5 mM and 25 mM glucose at 24 h, 36 h and 48 h (All p < 0.05) (Supplementary Figure 1B, 1C, 1D). In addition, the increase of PARP-1 is generally more obvious than the decline of SIRT-1, which can be approved by the results that almost all the time-treatments are significant (Supplementary Figure 1B, 1C, 1D, 1E). Taken together, high glucose induced PARP-1 overexpression and SIRT-1 down-expression in MCs in a time- and dose-dependent manner.


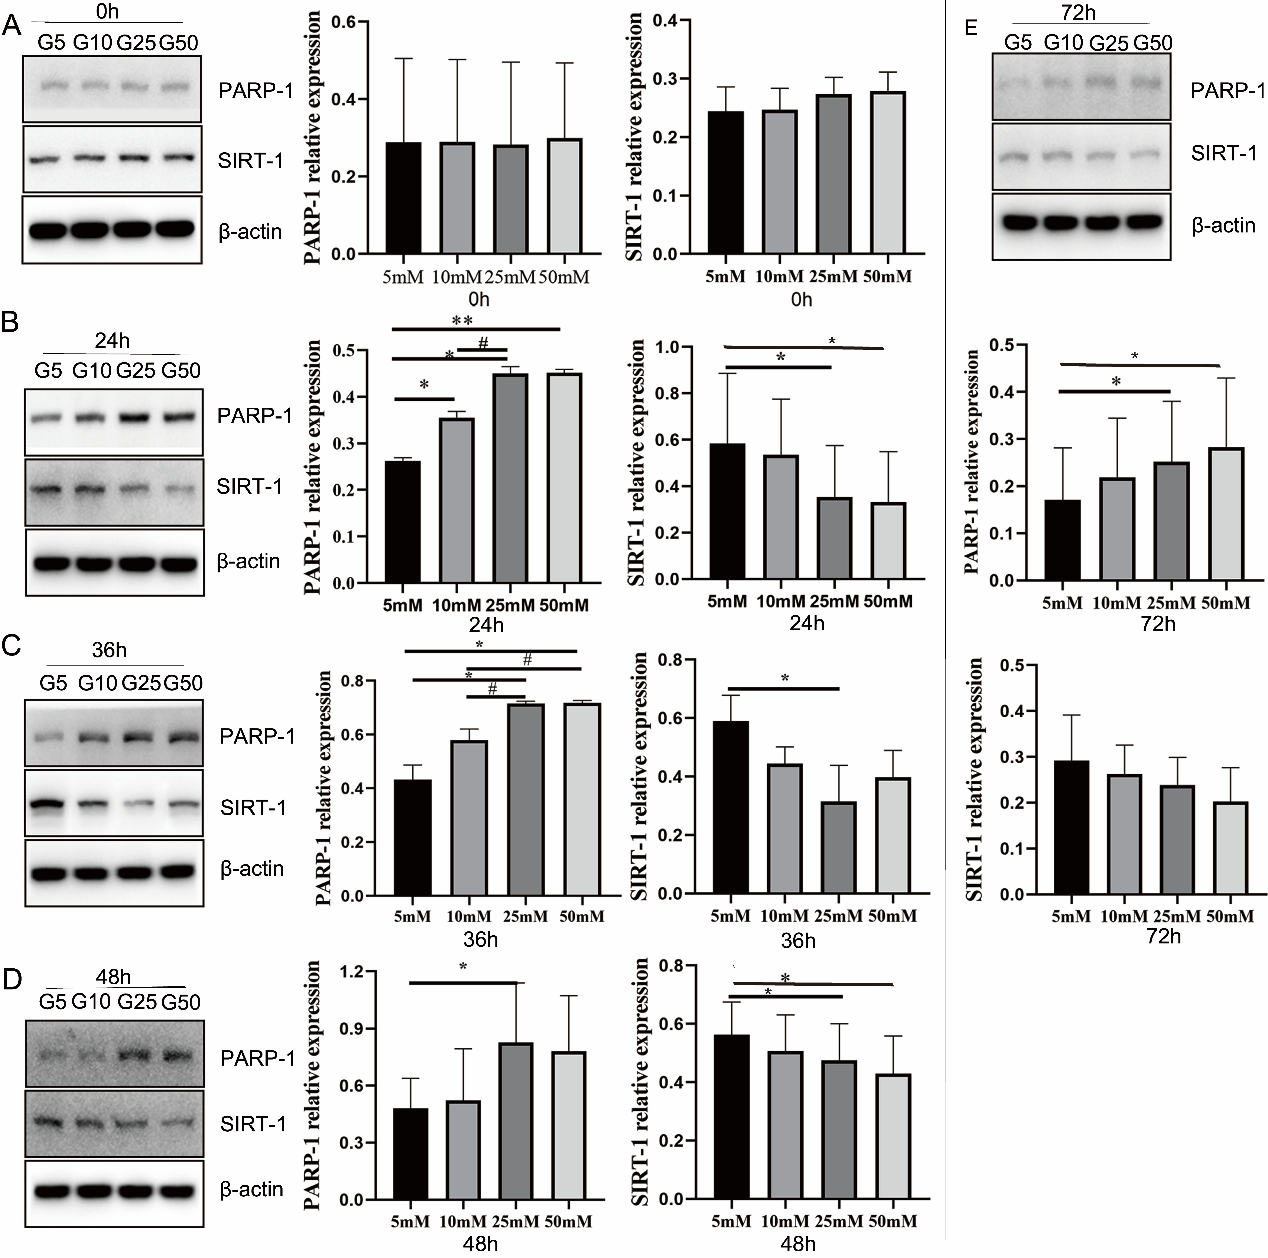
 Supplementary Figure 1. The effect of different doses of glucose in promoting PARP-1 overexpression and SIRT-1 down-expression in MCs at different time. A, Western blotting results showed that the expression of PARP-1 and SIRT-1 in MCs treated with hyperglycemia for 0 hours at a different step concentration from 5 mM to 50 mM. B, Treated the MCs for 24 h at the same step concentration. C, a step concentration treatment for 36 h. D, a step concentration treatment for 48h. E, a step concentration treatment for 72 h. All the data is presented as mean ± SD. We conducted 3 independent experiments. *Compared with treatment at a dose of 5 mM, *P <* 0.05; **Compared with treatment at a dose of 5 mM, *P <* 0.01. #Compared with 10 mM, *P <* 0.05.

# Supplementary data 2

## 2. Effect of PJ34 and EX527 on hyperglycemia-induced activation of MCs

To further explore functional dosage and time manner of PARP-1 inhibitor PJ34 and SIRT-1 inhibitor EX527, we tested PARP-1 and SIRT-1 proteins upon different dosage of PJ34 and EX527 treatment. As previous results show (Supplementary Figure 1), the levels of PARP-1 and SIRT-1 have changed significantly in the 24 h- and 48 h-treatment (p < 0.05, 5 mM vs 25 mM). Therefore, 24 h- and 48 h-treatment were selected as the detection time point at which we presented our experiments. Then we found that PJ34 inhibited PARP-1 dramatically at a concentration of 3 μL at 48 h (p < 0.05) while EX527 inhibited SIRT-1 prominently at a dose of 2 μL at 48 h (p<0.01) via Western blotting (Supplementary Figure 2B). The same phenomenon was found in the 24h-treatment, but the phenomenon observed in 48 h-treatment was more obvious due to the results of the Western blotting (Supplementary Figure 2A). Therefore, our results indicate that the inhibitors of PARP-1 and SIRT-1 exert their effect on hyperglycemia- activated MCs in a dose- dependent manner in which PJ34 was used at a concentration of 3 μL and EX527 was at 2 μL.


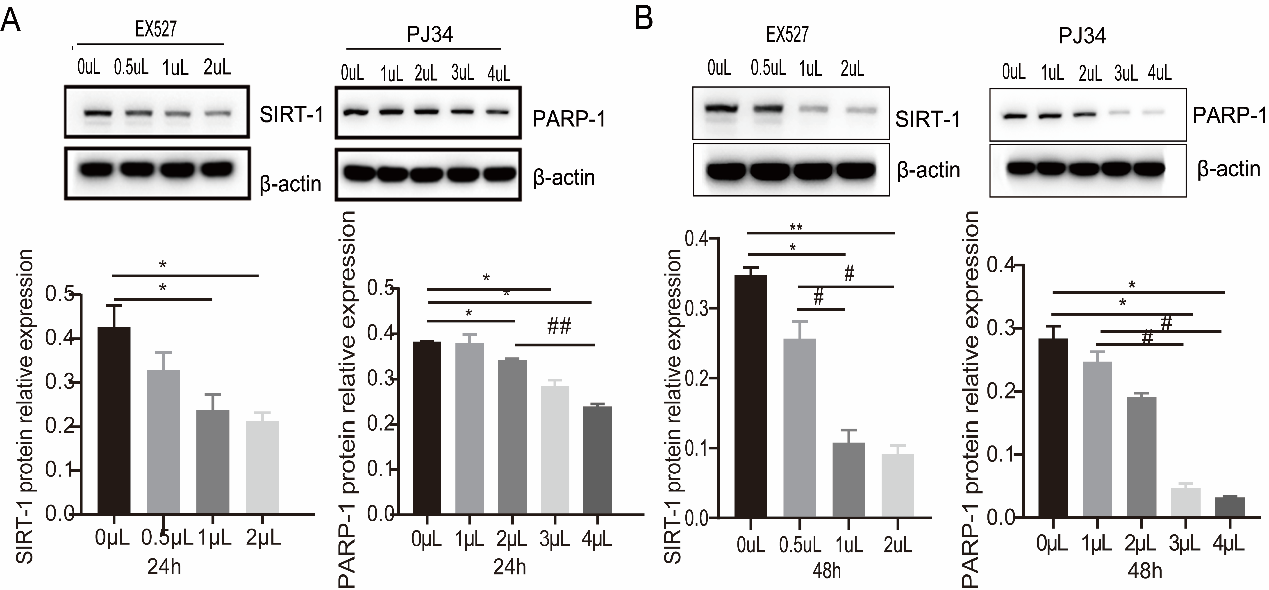
 Supplementary Figure 2. The effects of PJ34 and EX527 on hyperglycemia-activated MCs. A, Western blotting results showed that the expression of PJ34 and EX527 in MCs treated with hyperglycemia for 24 hours in a dose-dependent manner. Data of 3 independent experiments are presented as mean ± SD. *Compared with treatment at a dose of 0 μL, P < 0.05. In PJ34 treatment experiment, ##Compared with 2 μL, *P<* 0.01. B, Western blotting results showed that the expression of PJ34 and EX527 in MCs treated with hyperglycemia for 48 hours in the same step treatment. Data of 3 independent experiments are presented as mean ± SD. *Compared with treatment at a dose of 0 μL, P < 0.05, **Compared with treatment at a dose of 0 μL, P < 0.01. In EX527 treatment experiment, #Compared with 0.5 μL, *P <* 0.05. In PJ34 treatment experiment, #Compared with 1 μL, *P <* 0.05.

# Supplementary data 3

## 3. Effect of SIRT-1 overexpression lentiviral on SIRT-1 expression in activating MCs

In order to determine whether SIRT-1 can mediate the effects of high glucose on MCs, we applied a SIRT-1 overexpression lentiviral to elevate the expression of SIRT-1 in MCs. In the meantime, the negative control of Lv-SIRT-1 was also transfected into MCs for 48 hours to verify the potency of Lv-SIRT-1. MCs were then collected to examine SIRT-1 protein expression after transfection. As is showed in Supplementary Figure 3A and 3B, the protein expression of SIRT-1 protein in Lv-SIRT-1 group was significantly higher than that in low glucose group and high glucose group (p < 0.05) as well as negative control group, which was considered as statistically significant. Cumulatively these results suggest a pivotal role of Lv-SIRT-1 in elevating the expression of SIRT-1 in high glucose-induced activating MCs.


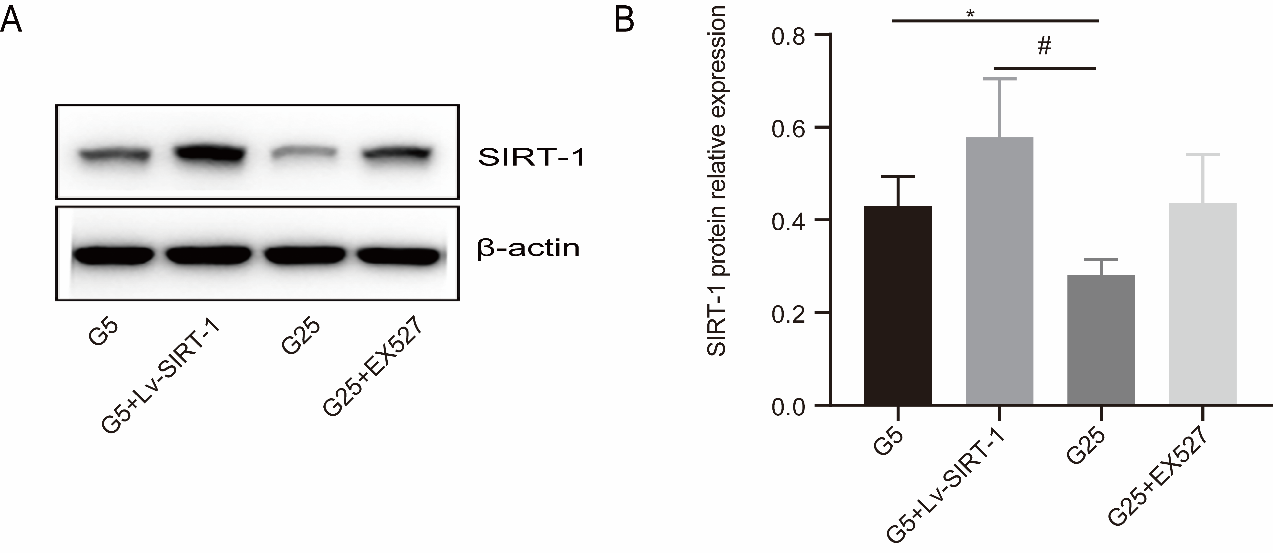
 Supplementary Figure 3. Lv-SIRT-1 can overexpress SIRT-1 in activating MCs. A, B, Western blotting results showed that the expression of SIRT-1 in SIRT-1 lentiviral group MCs treated with hyperglycemia for 48 hours is the highest compared with that in other 3 groups. Data of 3 independent experiments are presented as mean ± SD. *Compared with treatment at a dose of 5 mM glucose, P < 0.05. #Compared with Lv-SIRT-1 and lower level of glucose, *P <* 0.05.

# Supplementary data 4

## 4. Effect of NAD+ in db/db mice and in high glucose-induced activating MCs

As it has been mentioned that there is a significant role of NAD+ in relationship between PARP-1 and SIRT-1, the levels of NAD+ in *db/db* mice are also been estimated via an NAD+/NADH assay kit 3,4. Then we found a decline of NAD+ in *db/db* kidney tissues (p < 0.001), which suggests the reduction of NAD+ may take part in the pathophysiological mechanism of DN (Supplementary Figure 4A). To further unravel the mechanisms underlying DN corelated to SIRT-1, PARP-1and NAD+, we detected the levels of NAD+ in the high glucose-activated MCs. Since both SIRT-1 and PARP-1 are present in the nuclear compartment, the researchers have agreed that PARP-1 and SIRT-1 may compete for the same NAD+ substrate 5. PARP-1 has a higher affinity for NAD+ than SIRT-1 does, however, suggesting that over-activation of PARP-1 can easily reduce the activity of SIRT-1 due to the limit of NAD+ availability 6. In agreement with this hypothesis, we observed that the level of NAD+ in the high glucose-induced MCs was lower than the low glucose group (p<0.001) and the inhibition of PARP-1 by PJ34 reduced the effect of high glucose in the alleviation of NAD+ (p<0.001) (Supplementary Figure 4B). Furthermore, the same phenomena were also been observed when the level of SIRT-1 was enhanced via transfecting Lv-SIRT-1 (p<0.001) (Supplementary Figure 4B). Given the impact of PARP-1 and SIRT-1 on the modulation of NAD+ levels, it is possible to consider that the depletion of NAD+ is related to DN and hyperglycaemia-induced PARP-1 activation induces MCs activation via inhibition of the activity of SIRT-1 due to the deficiency of intracellular NAD+.


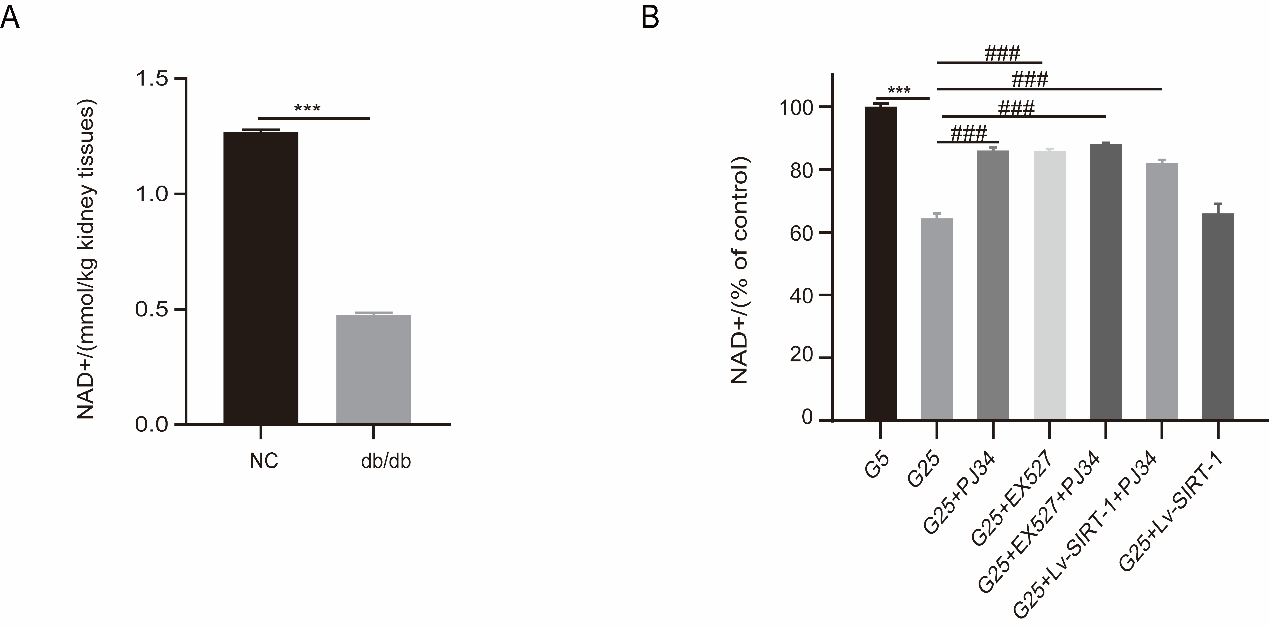


Supplementary Figure 4. NAD+ levels were determined either in the *db/db* mice kidney or in the activated MCs in the existence of hyperglycaemia with or without the inhibition of PARP-1 and SIRT-1. A, NAD+ activity change of in vivo animal was measured by NAD+/NADH activity kit. We conduct 3 independent experiments, all the data are presented as mean ± SD. ***Compared with NC, *P <* 0.001; B, NAD+ activity in high glucose induced MCs under the indicated measures. Bars represent mean ± SD of 3 independent experiments. ***Compared with G5, P < 0.001.  ###Compared with G25, P < 0.001.

# References

1. Wang X, Gao Y, Tian N, et al. Astragaloside IV represses high glucose-induced mesangial cells activation by enhancing autophagy via SIRT1 deacetylation of NF-kappaB p65 subunit. Drug Des Devel Ther. 2018;12:2971-2980.

2. Barriere DA, Noll C, Roussy G, et al. Combination of high-fat/high-fructose diet and low-dose streptozotocin to model long-term type-2 diabetes complications. Sci Rep. 2018;8(1):424.

3. Mohamed JS, Wilson JC, Myers MJ, Sisson KJ, Alway SE. Dysregulation of SIRT-1 in aging mice increases skeletal muscle fatigue by a PARP-1-dependent mechanism. Aging (Albany NY). 2014;6(10):820-834.

4. Papadimitriou A, Silva KC, Peixoto EB, Borges CM, Lopes de Faria JM, Lopes de Faria JB. Theobromine increases NAD(+)/Sirt-1 activity and protects the kidney under diabetic conditions. Am J Physiol Renal Physiol. 2015;308(3):F209-225.

5. Feng GS, Zhu CG, Li ZM, et al. Synthesis of the novel PARP-1 inhibitor AG-690/11026014 and its protective effects on angiotensin II-induced mouse cardiac remodeling. Acta Pharmacol Sin. 2017;38(5):638-650.

6. Kaiser A, Kruger T, Eiselt G, et al. Identification of PARP-1, Histone H1 and SIRT-1 as New Regulators of Breast Cancer-Related Aromatase Promoter I.3/II. Cells. 2020;9(2).
